# Supplementary material
Source: PubMed Central journal article supplement (PMC3430198)
Supplement: MCB.06769-11_zmb999109642so1.pdf [file MCB.06769-11_zmb999109642so1.pdf]

## Supplementary Figure 1

### TCF1E-WT CASTing sequences:

ctgcagCTTTGATCTTATTGCTTTGATCTCTCCGCGgaattc  
ctgcagTTCTTTGTGTTTTCCCTTTGATGTTGGCCGCgaattc  
ctgcagTGTCTTTGATGTTACCGATGGATTCGGGGGgaattc  
ctgcagTTACTTTGATCTTCCCTCCCTTTGATGTTTCGgaattc  
ctgcagATTTCTTTGATCTCACCGCTCCGATTCTGgaattc  
ctgcagTTTGCTTTGATCTTTTCGTAGTCTTTCTTTgaattc  
ctgcagTTTTCTTTGATCTTTCCGAAATGATGTCTgaattc  
ctgcagGTTCTTTGATGTTCCGAAAGTGTACCTgaattc  
ctgcagTATTTCTTTGATCTTGTGTTGATGTGGTGTgaattc  
ctgcagATTTCTTTGATCTCTTATGATTTCCCGCgaattc  
ctgcagTTCTGCCTTTGATATTTCTTTGATCTTCCgaattc  
ctgcagTATTCTCTTTGATGTTCCGACTTGTGTATTgaattc  
ctgcagGTATTGCTTTGATCTTTTACCGCCCGTTAGgaattc  
ctgcagTTTTTTCTTTGATCTCTACCGTCCATCTGCgaattc  
ctgcagGGTTCTCTTTGATCTTTCGGCTGATTCCgaattc  
ctgcagCGTGTTCTTTGATTTTGGCGACTATACTTTgaattc  
ctgcagTTTTTTCTTTGATCTTTCTTGTGTTGTTGCgaattc  
ctgcagGCTTTCCTTTGATCTTTTGGCGATGTGTGCgaattc  
ctgcagTATTATACTTTGATCTAGCCGATGGACGCTgaattc  
ctgcagTGGTTTATCTTTGATGTCGGCGATGGTATGgaattc  
ctgcagTGTTTGATCTTTGGCGCCTTTTCTTATTGgaattc  
ctgcagGCTACTGTCTCTTTGATGTTGGCGGTAGTgaattc  
ctgcagTCTATTGTTTTCTTTGATGTTACCGATGGTgaattc  
ctgcagCGTTGTCATTTCTTTGATCTTACCGCTATGgaattc  
ctgcagAATTCGTTTCTTCTTTGCTTTCATCTTGGCgaattc  
ctgcagTATTGTTTATTTACTTTGTTTGATGTTGGCgaattc  
ctgcagTTTTTTGTTTTTTCTTTGATCTTTCTGCGTgaattc  
ctgcagTGTTTCGTGGTGCCTTTGATGTATAATGGGgaattc  
ctgcagTTTGTTTATACGACTTTGATGTTGGCGCgaattc  
ctgcagGACTGAGATTCTACTTTGATGTCACCGCGAgaattc  
ctgcagGGATATCGCCCTTTGATCTTTTACTTTgaattc  
ctgcagGCTTGATATTCCCTTTGATCTTTGCGaattc  
ctgcagTTTCGGAATTTTCCCTTTGATCTTTGTTTTgaattc  
ctgcagTTTTACTGTTCTTTCTTTGATGTGGCGCTGgaattc  
ctgcagAGTGCTGGCGCTTCTTTGATCTTTAGAGTgaattc  
ctgcagAGTTTTTGATGTCCTTTGATCATGGCGCCgaattc  
ctgcagAATCGTGGTGATAGCTTTGATGTTTTACCGaattc  
ctgcagGTTTATTGATGTTCTCTTTGATCTTGGCGGgaattc  
ctgcagCTTATGTGGGTACTCTTTGATGTTTTATTgaattc  
ctgcagTATTGTTTTTTTTCTTTGATCTTTTTTgaattc  
ctgcagACACAGATTAAGATGCTTTGATGGTGGCgaattc  
ctgcagGATGCTTTTTGTTCCCTTTGATCTTTGCGCgaattc  
ctgcagGCTCCATTTGTTGTTCTTTGATCTTACCGCgaattc  
ctgcagAATCCAGGAACGTTCCCTTTGATCTTTGGCgaattc

ctgcagAGCAAGATTTGTGTCCCTTTGATCTTCTCCgaattc  
ctgcagTTTGGTATGGTGTTTTCTTTGATCTTGCCGgaattc  
ctgcagTCTAGTTCTGAACCTTTCTTTGATCTTTTGCgaattc  
ctgcagACTTATTGATGTTTCGCTTTGATGTGTGCCgaattc  
ctgcagCTAACAAGTAGTGTCTCTTTGATGTGTGCCgaattc  
ctgcagGCTTGTACGTGTTCTTTCTTTGATCTTGCCgaattc  
ctgcagGTATTTCCGATAGTGTCTTTGATCTTGCCgaattc  
ctgcagGCTTTTTCTTTCTATACTTTGATCTTACCgaattc  
ctgcagGGTGCTGTTCTTTTTTTCTTTGATCTTTGCgaattc  
ctgcagGCCGATTTTATGTTGTCCTTTGATGTTTCCgaattc  
ctgcagTGTTTTGTTGTCCGCATTCTTTGATGTTTGgaattc  
ctgcagTTTGCATTTTGATGTTTGCTTTGATGTACCgaattc  
ctgcagGTTATGTTGCCGTTTTCTTTGATGTGTTgaattc  
ctgcagCGGTTCCCTGGATCTTTACTTTGATCTTCCgaattc  
ctgcagTCCATTAGCGGTACGCCTCTTTGATCTTGTgaattc  
ctgcagTATCCGATTAGCGGTATGTCTTTGATGTTgaattc  
ctgcagCATATTTGTAGGCCGCATACTCTTTGATGTgaattc  
ctgcagGTTTTTAATTCTCTTTTTGATCTTTGCCgaattc  
ctgcagGCTTTGATGTGTGCCAACTTGCTTAGGCGTgaattc  
ctgcagTTGTTGATGTGTACTTTTTGATGTGTTCCgaattc  
ctgcagTTTCTTTGATGTTGCCGCTTCTAATTCAGAattc  
ctgcagAATGTTGATCTAGCCGCCATTTTAGGGTCgaattc  
ctgcagATTTCTTTGATCTGTACCGCTTATCGAGCgaattc  
ctgcagCTTTGTTGATCTCGCCGCTTAACGCTCTgaattc  
ctgcagCTTTGTTGATGTTACCGCTTTGTTGTTGTTgaattc  
ctgcagAATAGCTTTGATGTACCGCTGGTACTGTTTgaattc  
ctgcagGTTTCCTTTGATCTTTCTTTGATGTTGTgaattc  
ctgcagTTTCCCTTTGATGTTTATTTTGCTTTTTTCGgaattc  
ctgcagTGGANGCTTTGATGTTTCCGATCATGCTTTgaattc  
ctgcagCGGTCTCTTTGATGTTTGATCGTTGTGATCgaattc  
ctgcagGCTGTTTCTTTGATCGTACCGCATTGCTTTgaattc  
ctgcagTCTTTAGGCTTTGATCTTTTCCGTCTTTGGgaattc  
ctgcagTCGGCGATATCCTTTGATGTTTTTGTATgaattc  
ctgcagAGTATTTGATCTTTGTTGATGTTGCCGCTgaattc  
ctgcagAGGTTTTATATTATTCTTTGATGATGCCGgaattc  
ctgcagTCTCATTTCCGCTTTGTTGATCTTTGTTTgaattc  
ctgcagGGCTTCCGGTGGTTTCCTTTGATGTGTGCCgaattc  
ctgcagGTTGTTTTTGGTTGTTCTTTGATCTTACCgaattc  
ctgcagCATGTTTGATTTTATTTCTTTGATGTTGCCgaattc  
ctgcagGATCACCTCTCTGACTCCTTTGATCTTGCCgaattc  
ctgcagTTCTTTTGATGTTAGCTGTTTGATGTTGCCgaattc  
ctgcagGTGTGATATCCCGTTTCTTTGATCTCGCCgaattc  
ctgcagTTTACTTTGATGTTTGCTTTCATCTTGCCgaattc  
ctgcagGTACACTTTTGTATTATGTTTGATCTTGCCgaattc  
ctgcagTGCCCGATTGTGTTTGTCTTTGATGTTGCCgaattc  
ctgcagCGTCTTTTTATTTGTTACTTTGATCTTGCCgaattc  
ctgcagTGTCATTGGATTGTTTGTTTCATCTTGCCgaattc

ctgcagTTTCCGGATATTTTGGTCTTTGATTTTCCGgaattc  
ctgcagCTTGTTGGTAGAAATGTCTTTGATGTACCCgaattc  
ctgcagTCTTCTCTGATATATTTCTTTGATCTTTCCgaattc  
ctgcagTCTTTCTTATGTTGCTTCTTTGATGTGCCgaattc  
ctgcagTTCCTCTTTGATGTTTCCCTTTGATCTGCCgaattc  
tagtctCCCTTTGATGTACCCCATCCCTTACTACGtgacag  
ctgtcaACGCTTTGATCCGCCACGGTTTTTTGGCCagacta  
ctgtcaGTTATCCCTTTGATGTGGCCCTGGCTCGCagacta  
tagtctGTGTCAAACCTTTGATCTTACCCACGCCTCtgacag  
tagtctAGGCCGGTACTTTGATGTTTTGCCGATGTCTtgacag  
ctgtcaTGTCACCCCTTTGATGTGCCCTAACGTAagacta  
ctgtcaCGAAACCCCTTTGATGTTGCCCGTGTtagacta  
ctgtcaTCGCCGCCCTTTCATCTTTTCTTTATTTTCagacta  
ctgtcaTGGCTGTTCTCTTTGATCTCTTTGATCTACagacta  
ctgtcaGCCGATTGTCTTTGATCTTGCTCTACTGGagacta  
ctgtcaGCTACTGTCACTTTGATCTCTCCGACTTCCagacta  
ctgtcaCGTGGCGGGGCCCTTTGATGTGGATGGGGTtagacta  
ctgtcaTCCCCACTAAACTTTGATGATGCCCTAACagacta  
ctgtcaTGATGGTGTTCGTCTTTGATGTTACCCCGGTtagacta  
ctgtcaAATAATCGGATGCTTTGATGTACCCCGTCTagacta  
ctgtcaTGCCTGGCTGCCTTTGATGTTTTATTTAAAagacta  
ctgtcaGCCCGATGTGTGCTTTGATGTTTGCCGATCagacta  
ctgtcaGGCCTTTGATCTGTTGATGTGCCCGTCTagacta  
ctgtcaATCCGTCCTCTTTCTTTGATCGTGCCGTCTagacta  
ctgtcaTCGCACTGCCGGTACCTTTGATGTTTTATGTtagacta  
ctgtcaCTTGCCGGCGGTATCCTTTGATCTTTTATGTtagacta  
ctgtcaTGATCATGCGAACGCTTTGATCTCCCCGATagacta  
ctgtcaGGTTCCCGCGAGCTCTTTGATGTTACCCCCagacta  
ctgtcaGAGCACTCAGAACTCCTTTGATGTACCCCCagacta  
ctgtcaACTACGCCGATATGCCTTTGAACTAGCCGCTagacta  
ctgtcaGTCTCTTCCCAGTCCCTTTGAACTTACCCagacta  
ctgtcaGCCTCTCCTTCGCTCCCTTTGATCTTACCagacta  
ctgtcaTCATATGCCGCTACTGCCCTTTGATCTTTTAagacta  
ctgtcaTGTCGGATGTCCGGCCTTCTTTGATCTGGCagacta  
ctgtcaTTGGTGCCTCCGCCAAGGTTCTTTGATCTTGagacta  
ctgtcaTGTCGGGTGCCGCCGTGTTCTTTGATCTTCagacta  
ctgtcaGGCCCTCGGCCGGTGGCTCCTTTGATGTTGagacta

**Supplementary Fig. 1** CASTing sequences pulled down by TCF1E<sup>WT</sup>. 128 independent oligonucleotides pulled down by TCF1E<sup>WT</sup> were TOPO cloned and sequenced. A portion of the flanking constant regions used for PCR amplification are in lowercase lettering. The random portion of the original DNA library is in uppercase lettering. WREs are highlighted in yellow. Downstream Helper sites tended to be in the RCCG orientation (green) downstream WREs, whereas upstream Helper sites tended to be in the CGGY orientation (reverse complement, blue) upstream WREs.

## Supplementary Figure 2

### TCF1Emut CASTing sequences:

ctgcagCTTTGTCTTTGATTTTCGCTTTGATTCCTTTgaattc  
ctgcagCTTTGAAATATTGCTTCTCTTTGATCCTTTTgaattc  
ctgcagCTTTGATCCTTTTTATTGCTTTGATCTTACgaattc  
ctgcagCCTTTGATCCTTTGATCTCTTTGATCTTCTTgaattc  
ctgcagCCTTTGATCCTTTGTCCTTTGATGTGTGGCgaattc  
ctgcagTCTTTGATGTTTTCTTTGATCCTTTTTGGgaattc  
ctgcagTCTTTGATGTTTTGTTTTGCTTTGATCTATgaattc  
ctgcagTCTTTGATCCTTTGATTACTCTTTGATCTTgaattc  
ctgcagCCTTTGATCCTTTCTTTGATCTTTGTGGCgaattc  
ctgcagCCTTTGATGTTAAACTTCAAAGCAAAGCgaattc  
ctgcagCTCTTTGATCTTTCTTTGATCCTTTTTGTTGgaattc  
ctgcagGCCTTTGATCTTTCCTTTGATCCTTTGTGGgaattc  
ctgcagTCCTTTGAAGTTGTCTTTGATCCTTTCATGgaattc  
ctgcagTCCTTTGATGTTATTTCCCTTTGATGTTTCGgaattc  
ctgcagTCCTTTGATCCTTTTTTGTCTTTGATGTGTAGaattc  
ctgcagTACTCTTTGATCCTTTTTGAGTTCTTTGATCTTgaattc  
ctgcagTGTCTTTGATCTTTCCTTTGATGTTTCGAAGTgaattc  
ctgcagTTTCTTTGATCTTTCTTTGATGCCGTATGgaattc  
ctgcagTTGCTTTGATGTTCTGCTTTGATCTTTGCgaattc  
ctgcagGTTCTTTGATGTATTTGTCTTTGATCTATGgaattc  
ctgcagTTTGCTTTGATCTTTGTCTTTGATCTTGGAGaattc  
ctgcagCTTCCTTTGATGTCGCTTTGATCTTATGGGgaattc  
ctgcagTTTCCTTTGATCTTTCCTTTGATCCTTTGTGgaattc  
ctgcagTTTCCTTTGATCCTTTCCTTTGATGTAGCCgaattc  
ctgcagAACTCTTTGATCTGAGCTTTGATGTTTGGGgaattc  
ctgcagGTTGCTTTGATGTTTTGCTTTGATCTTTGCgaattc  
ctgcagCTTGCTTTGAATCCTTTCCTTTGAAGTTGGGTgaattc  
ctgcagTTTTCTTTGATCCTTTTGCTTTGATGTCCTAGgaattc  
ctgcagGTTCCCTTTGATGTTCCCTGCTTTGATGTCNGgaattc  
ctgcagTTTCCTTTGTATCCTTTTTGCTTTGATGTCTgaattc  
ctgcagATCCCTTTGATGTTTATAATTCTTTGATGTgaattc  
ctgcagTGTTCTTTGATGTTTGCTTTGATGTGGGTgaattc  
ctgcagTTTGCTTTGATGTTTTGTTTGATGTTTGCTgaattc  
ctgcagTTTCCTTTGATCTTCTGTGTTTTCTTTTATgaattc  
ctgcagTGTCTCTTTGTTTTCTTTGATCTTCTTTgaattc  
ctgcagAATCACTTTGATCTTTCCTTTGAGCTTTCCTCgaattc  
ctgcagTTTCCCTTTGATCTTTCCTTTGATGTCGGGgaattc  
ctgcagTTTCCCTTTGATCCTTTCCTTTGATGTTTGTgaattc  
ctgcagTTTTCCCTTTGATGTTTCTCTTTGATGTCCCgaattc  
ctgcagGTTCTCTTTGATCCTTTTTCTTTGATGTGTTgaattc  
ctgcagAAATCCTTTGATCCTTTTCGAGTTCGTGGCgaattc  
ctgcagAATTCTCTTTGATCTTTGATGACATGTGTCgaattc  
ctgcagCCTTTGCTTTGATGTTCTTTGATCTGTGCGgaattc  
ctgcagTTTTTTCTTTGATCTTTCCTTTGATCTAAGTgaattc

ctgcagTTTTTCCTTTGATCTTTATCCTCTTCTTTGgaattc  
ctgcagGATTTCCCTTTGATCTTTTGTTTCTCGCTTTgaattc  
ctgcagTGTTTTCTTTGATCTTTTATCTTATGCTTTgaattc  
ctgcagTTTTTCCTTTGATCTTTTTGTATCAAAGAgaattc  
ctgcagTTATTCCTTTGATCTTTTGTTTGATTTACTgaattc  
ctgcagTGAACCTTTGATCTTTCCTTTGATGTGTTgaattc  
ctgcagTGTTTCCCTTTGTTCTCTTTGATCTTTGTGgaattc  
ctgcagGCAATTCCTTTGATCTTCCTTTGATGTGTCgaattc  
ctgcagCTTTTTTCCTTTGATCTTTCCTTTGTTCTTCCgaattc  
ctgcagGGTTTTTCTTTGATCTTTTCTTTGATGTGGgaattc  
ctgcagCTTTTTTCCTTTGATTCTTTCCTTTGTTCTTCCgaattc  
ctgcagCTTTTTGCGCTTTGATCTTTTTCTTCAAACgaattc  
ctgcagTGTTTGATGTTTTGCTTTGATCTTTTGTTgaattc  
ctgcagCTTTTGATCATCATTCTTTGATGTTTGCTGgaattc  
ctgcagTTTCTTTTATCTTTCCTTTGATCTTTTTTCGgaattc  
ctgcagGCTTTTGATGTTTTCCCTTTGATCTTTGTTgaattc  
ctgcagGTTATTTTCATCTTTCCTTTGATCTTTCGTgaattc  
ctgcagACTCTTTTGATCTTTTTCTTTGATCTTAGTgaattc  
ctgcagTCGTTTGATCTGCGAACCTTTGATCTTTTGgaattc  
ctgcagTATTCTTTTGATGTTTCTCTTTGATCTTTgaattc  
ctgcagTTTATCCCTTATATCTTCGCTTTGATCTTGgaattc  
ctgcagGGCAGCATTGATCTTTTCCTTTGATCTAGgaattc  
ctgcagTTTTCTTTTGATCTTTTCGCCTTTGATCTTgaattc  
ctgcagTTTTCTTTTGATCTTTTCGCCTTTGATCTTgaattc  
ctgcagATCTATTCTCTTA<sup>GCCG</sup>TTTCCTTTGATGTgaattc  
ctgcagTTTTTCCTTTTGATGTTTTTTCTTTGATCTTgaattc

**Supplementary Fig. 2** CASTing sequences pulled down by TCF1E<sup>mut</sup>. 70 independent oligonucleotides were pulled down by TCF1E<sup>mut</sup>. The flanking constant regions of the DNA library are in lower case lettering, WREs are highlighted in yellow, and Helper sites are highlighted in green.
